# Supplementary material for: Intercellular and intracellular cilia orientation is coordinated by CELSR1 and CAMSAP3 in oviduct multi-ciliated cells
Source: Oxford University Press journal article supplement (doi:10.1242/jcs.257006), 2021-01-19
Supplement: jcs257006supp.pdf [file jcs257006supp.pdf]

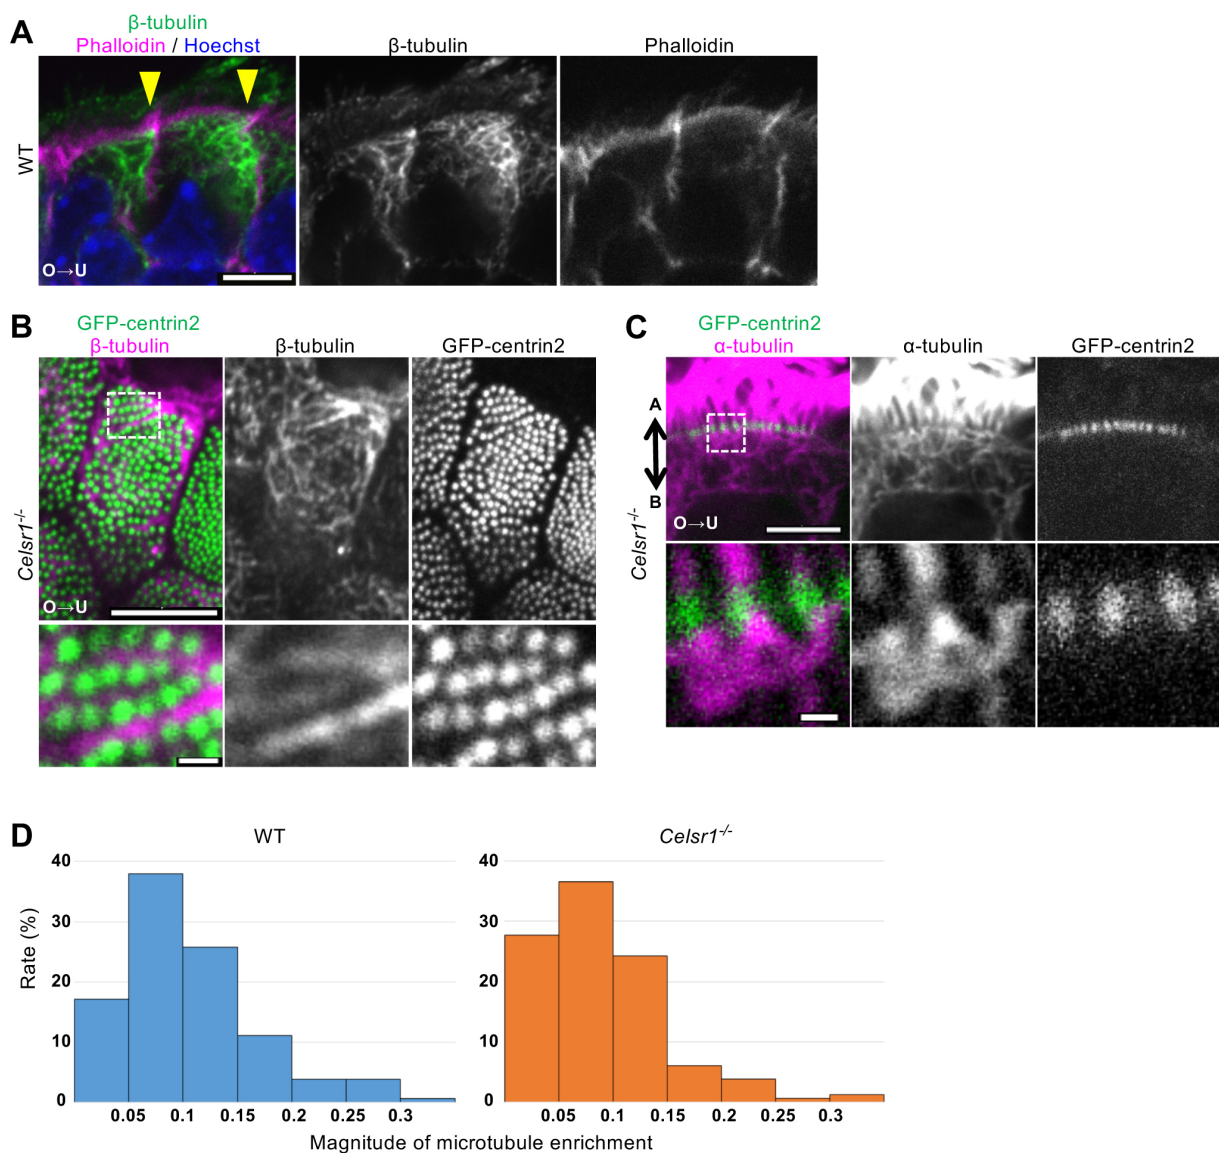

### Fig. S1, Microtubule organization was maintained in *Celsr1*<sup>-/-</sup> MCC

A, Lateral view of WT MCCs stained with anti- $\beta$ -tubulin (green) and phalloidin (magenta). Arrowheads indicate cell-cell boundary identified by phalloidin signals. (Bar = 5  $\mu$ m) B and C, Apical (B) and lateral view (C) of MCCs of *Celsr1*<sup>-/-</sup>; *GFP-CETN2* transgenic mice stained with anti- $\beta$ -tubulin (magenta in B) or anti- $\alpha$ -tubulin antibodies (magenta in C). The ovarian and uterine side are on the left and right, respectively in all images (shown as O > U). B, Top row, MIP image was rendered from three images acquired at a step size of 0.2  $\mu$ m. Bottom row shows high magnification images of a single plane. C, Single plane images. Bottom row, high magnification. Apical is to the top of the images. (Bar = 5  $\mu$ m and 0.5  $\mu$ m in the top and bottom rows, respectively, in both B and C.) D, Histograms show the results of quantifying the magnitude of microtubule enrichment near the cell-cell boundary in WT and *Celsr1*<sup>-/-</sup> MCCs. The lower the value of the magnitude, the more uniform the distribution of microtubules. The same samples shown in Fig. 2 B and B' are used. 369 cells and 347 cells in WT and *Celsr1*<sup>-/-</sup> tissues, respectively, were used for the analysis.

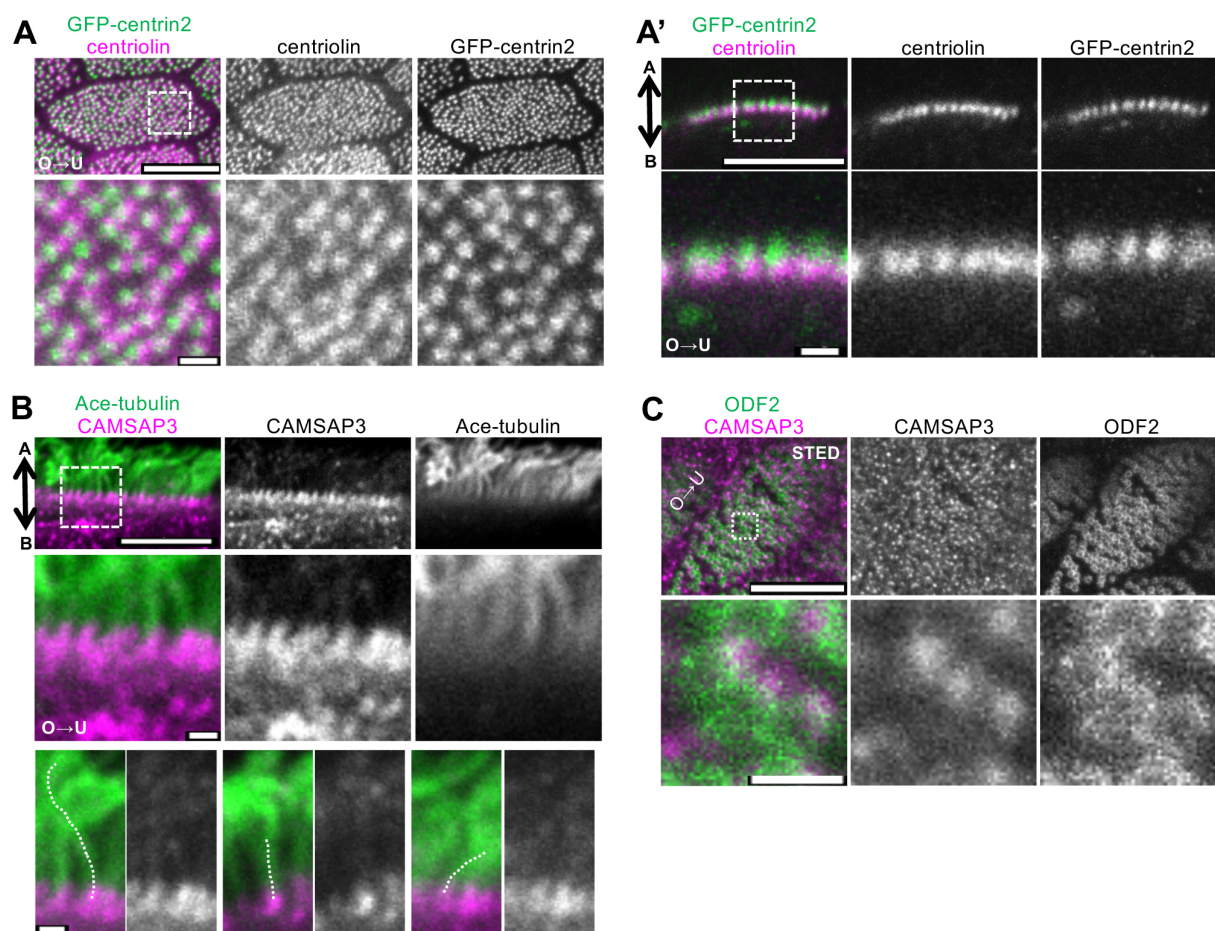

### Fig. S2, Localization of BB related proteins

A and A', Apical (A) and lateral (A') views of the oviduct expressing GFP-centrin2 (green) stained with anti-centriolin (magenta) antibody. MIP images rendered from 5 images acquired at a step size of  $0.2\ \mu\text{m}$  (A), and single plane images (A'). Lower panels show magnified views of the boxed region in the upper panel. (Bar =  $5\ \mu\text{m}$  (top), =  $0.5\ \mu\text{m}$  (bottom)) B, Lateral view of adult WT oviduct stained with anti-CAMSAP3 (magenta), and anti-acetylated tubulin (green) antibodies. Middle panels show magnified images of the boxed region in the upper panel. Bottom panels show cilia (dotted lines) standing with different angles from the apical surface. (Bar =  $5\ \mu\text{m}$  (top panels),  $0.5\ \mu\text{m}$  (middle panels), and  $0.5\ \mu\text{m}$  (bottom panels)) C, Super resolution images (obtained by STED) of WT oviduct stained with anti-CAMSAP3 (magenta) and anti-ODF2 (green) antibodies. MIP image was rendered from three images acquired at a step size of  $0.2\ \mu\text{m}$ . Bottom panels show the magnified images. (Bar =  $5\ \mu\text{m}$  (top) and  $0.5\ \mu\text{m}$  (bottom))



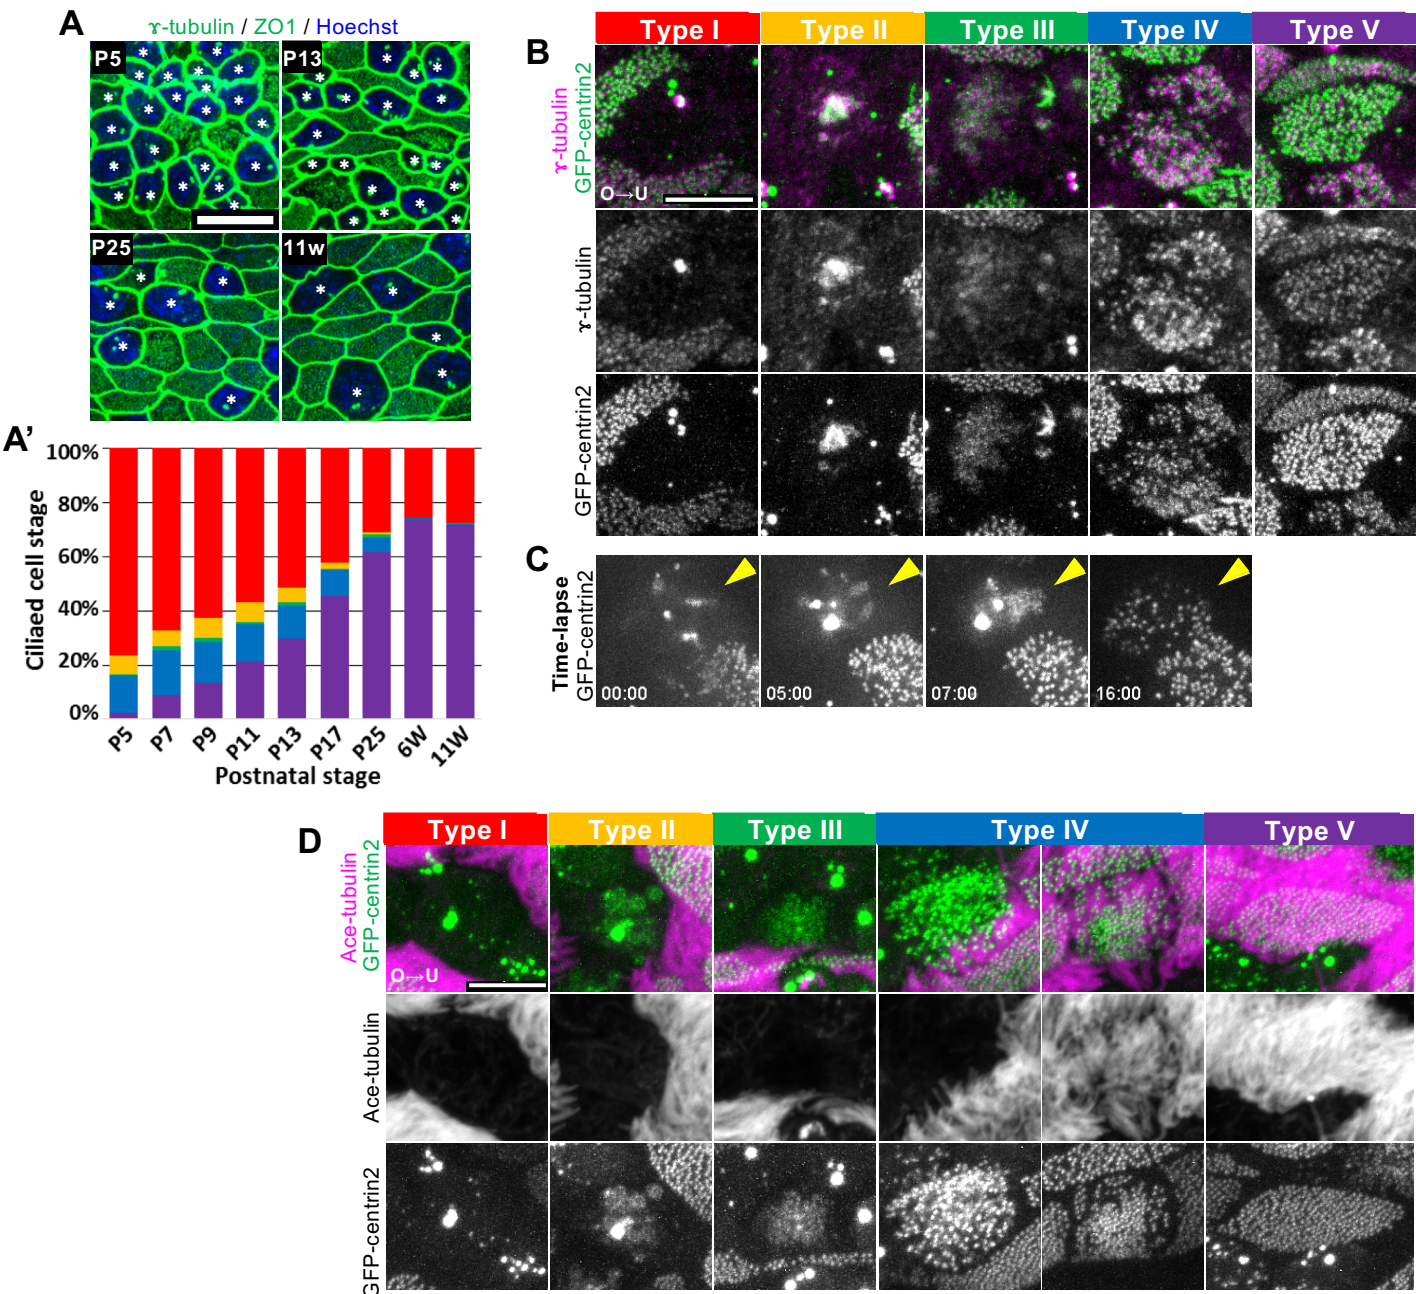

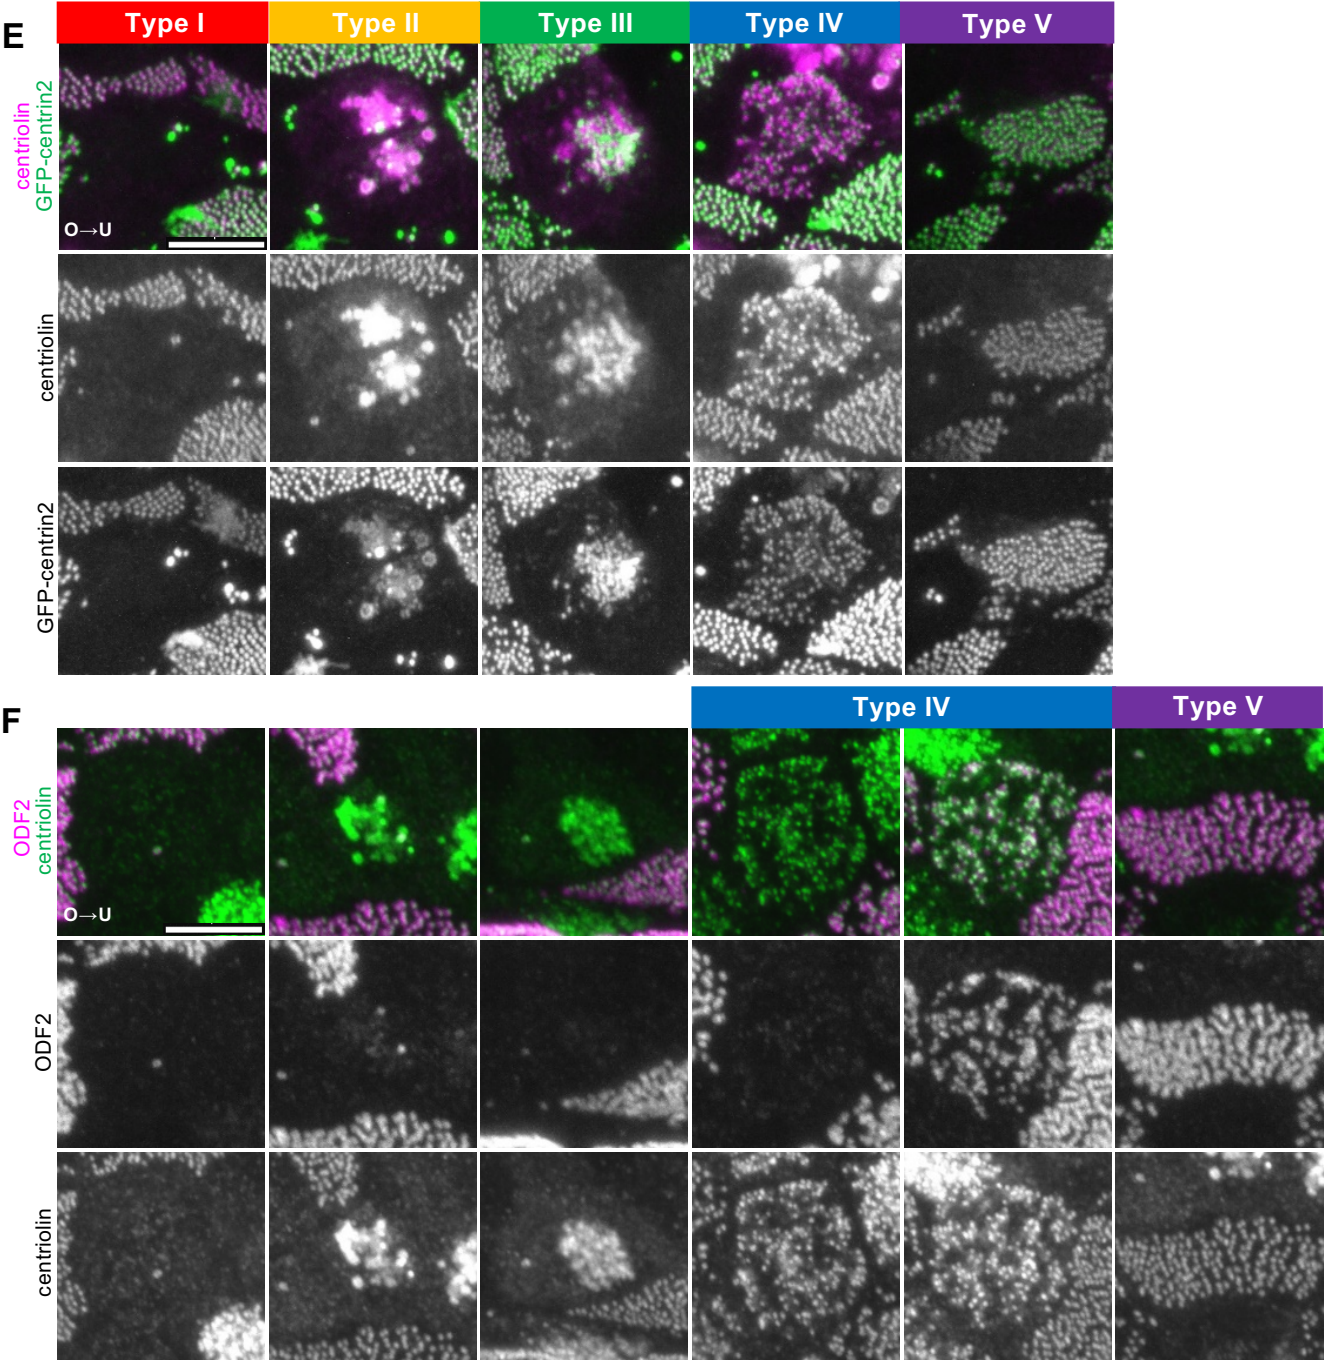



**Fig. S3, Cell type transition and localization of BB proteins during the maturation process of oviduct MCCs**

A, Representative images of oviducts on postnatal day 5 (P5) to 11 weeks (11w) stained with anti-ZO1 (green), anti- $\gamma$ -tubulin (green), and Hoechst (blue). Secreting cells (which are categorized as type I) are shown with asterisks. (Bar = 10  $\mu$ m) A', Changes in cell type composition at each developmental stage. Oviducts from three animals were used for the analysis. Analyzed cell numbers; 1469 (P5), 2341 (P7), 1999 (P9), 1609 (P11), 1791 (P13), 2077 (P17), 2807 (P25), 2493 (6w), and 2870 (11w). B, Confocal images of the oviduct expressing GFP-centrin2 (green) stained with anti- $\gamma$ -tubulin (magenta). MIP images were rendered from 30 images acquired at a step size of 0.2  $\mu$ m. (Bar = 5  $\mu$ m) C, Snapshot images after time-lapse recording (same as Sup. Mov. 2) of *GFP-CETN2* oviduct. Arrowheads indicate the cell of interest undergoing cell type transition. Timepoints are shown on the bottom. D, Confocal images of the P13 oviduct expressing GFP-centrin2 (green) stained with anti-acetylated tubulin antibody (magenta). MIP images rendered from 50 slices acquired at a step size of 0.2  $\mu$ m. (Bar = 5  $\mu$ m) E, Confocal images of the P13 oviduct expressing GFP-centrin2 (green) stained with anti-centriolin antibody (magenta). MIP images rendered from 30 slices acquired at a step size of 0.2  $\mu$ m. To compare signal intensities between cell types, all the images were cropped after simultaneously acquired images. F, Confocal images of P13 WT oviduct stained with anti-centriolin (green) and anti-ODF2 (magenta) antibodies. MIP images rendered from 30 slices acquired at a step size of 0.2  $\mu$ m. All the images were cropped after from simultaneous acquisition. Two representative type IV cells with different ODF2 staining patterns are shown. ODF2 localized to BBs in 83% (183/221) of type IV cells and 100% of type V cells. (Bar = 5  $\mu$ m)

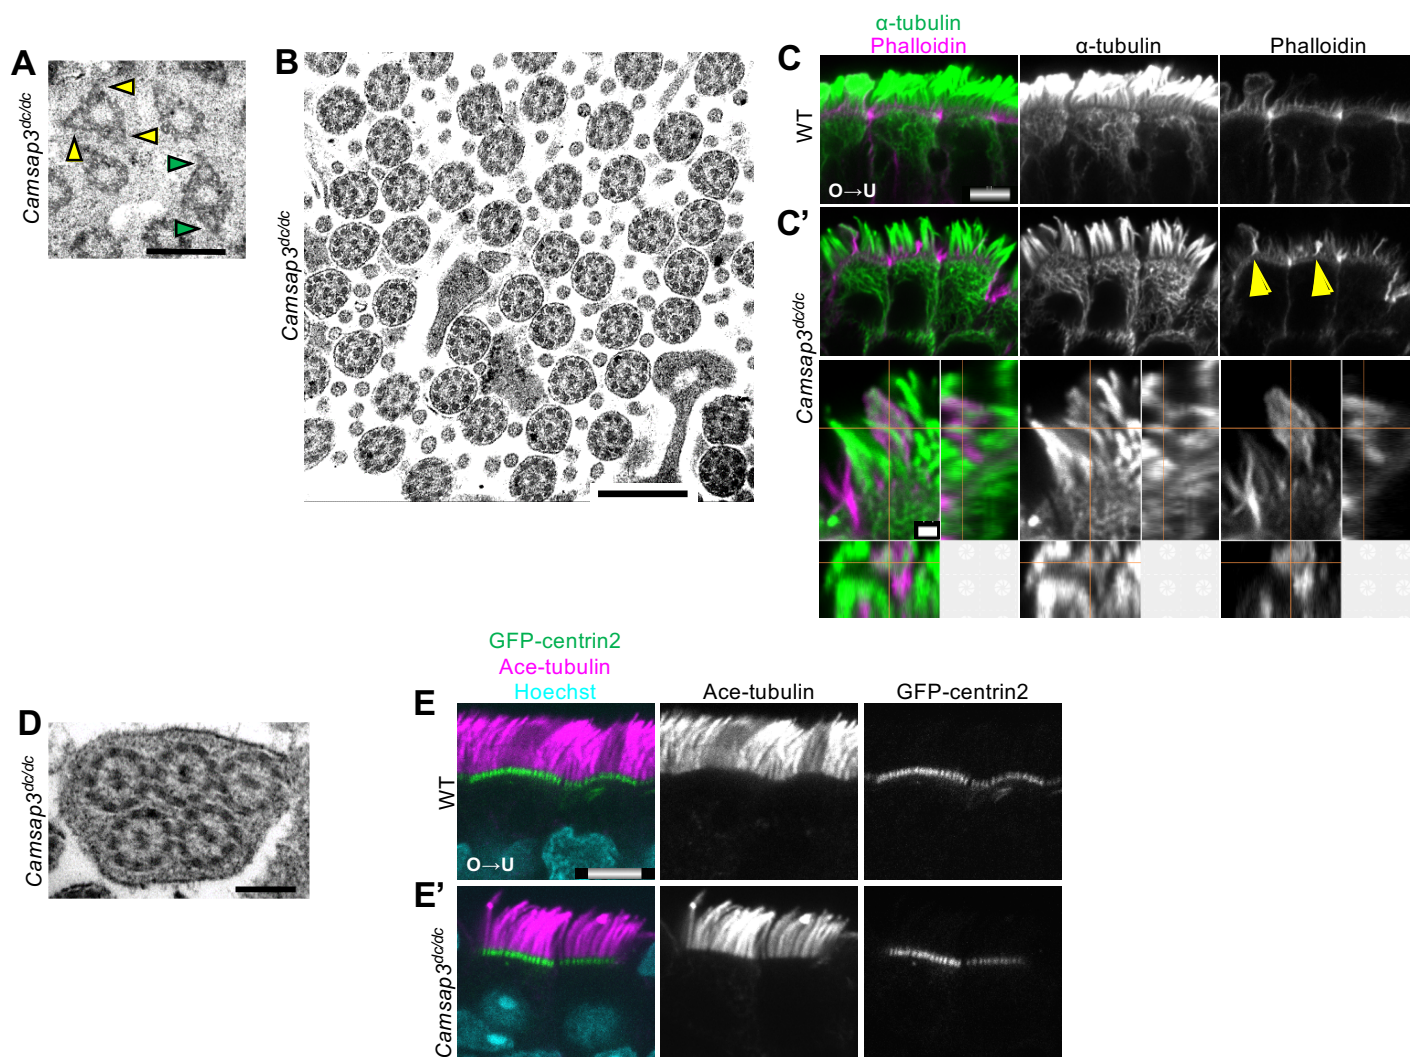

**Fig. S4, Distribution of microtubules in *Camsap3<sup>dc/dc</sup>* mutant MCCs**

A, Images of BBs observed with a transmission electron microscopy showing examples of abnormal BBs with multiple protrusions resembling BF (shown with arrow heads). High magnified image of Fig. 5E. (Bar = 0.5  $\mu$ m) B, Electron micrograph of axonemes in a *Camsap3<sup>dc/dc</sup>* oviduct MCC. Central pair microtubules were observed in all the axonemes. C and C', Lateral view of oviducts of WT (C) and *Camsap3<sup>dc/dc</sup>* (C') stained with anti-α-tubulin antibody (green) and phalloidin (magenta). Bottom rows of (C') show 3D orthogonal views of abnormal protrusions with phalloidin signals (indicated with arrowheads). (Bar = 5  $\mu$ m (top) and 1  $\mu$ m (bottom)) D, Electron micrograph of abnormal cilia. Multiple axonemes within the same ciliary membrane. (Bar = 0.2  $\mu$ m) E and E', Lateral view of MCCs of WT and *Camsap3<sup>dc/dc</sup>* animals with GFP-centrin2 (green) stained with anti-acetylated tubulin antibody (magenta) and Hoechst (cyan). (Bar = 5  $\mu$ m)



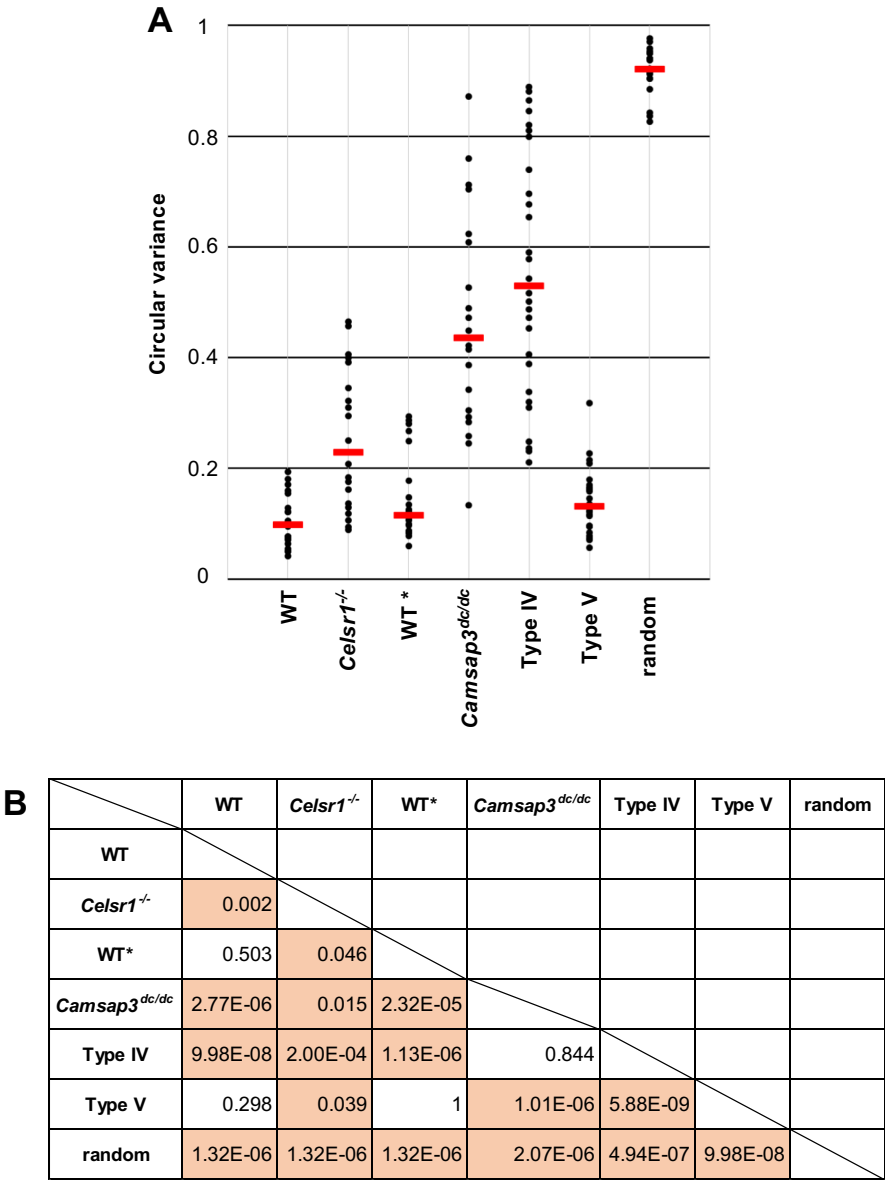

**Fig. S5, Statistical comparison of CVs in MCCs between genotypes and cell types**

A, Data sets from Fig. 1D, 4E, and 5C were summarized for comparison. The distribution of CVs in MCCs is shown. Each point on the graph corresponds to one cell. Red line represents the median CV in each category (WT: 0.098, *Celsr1*<sup>-/-</sup>: 0.23, WT\*: 0.11, *Camsap3*<sup>dc/dc</sup>: 0.44, Type IV: 0.53, Type V: 0.13, random: 0.92). “WT” and “*Celsr1*<sup>-/-</sup>” show results of the 12 w old (same data as shown in Fig. 1D, n = 20 cells). “WT\*” and “*Camsap3*<sup>dc/dc</sup>,” results of adult littermates (shown in Fig. 5C, n = 20 cells in WT and *Camsap3*<sup>dc/dc</sup>). “Type IV” and “Type V,” results of WT P13 (shown in Fig. 4E, n = 28 cells in each cell type). “random” is the result of a calculation using random numbers corresponding to 150 BBs, n = 20 cells. B, A table showing P values after the comparison between two groups. Non-parametric multiple comparisons were performed using the Steel-Dwass method. *p* values smaller than 0.05 are shown in orange.

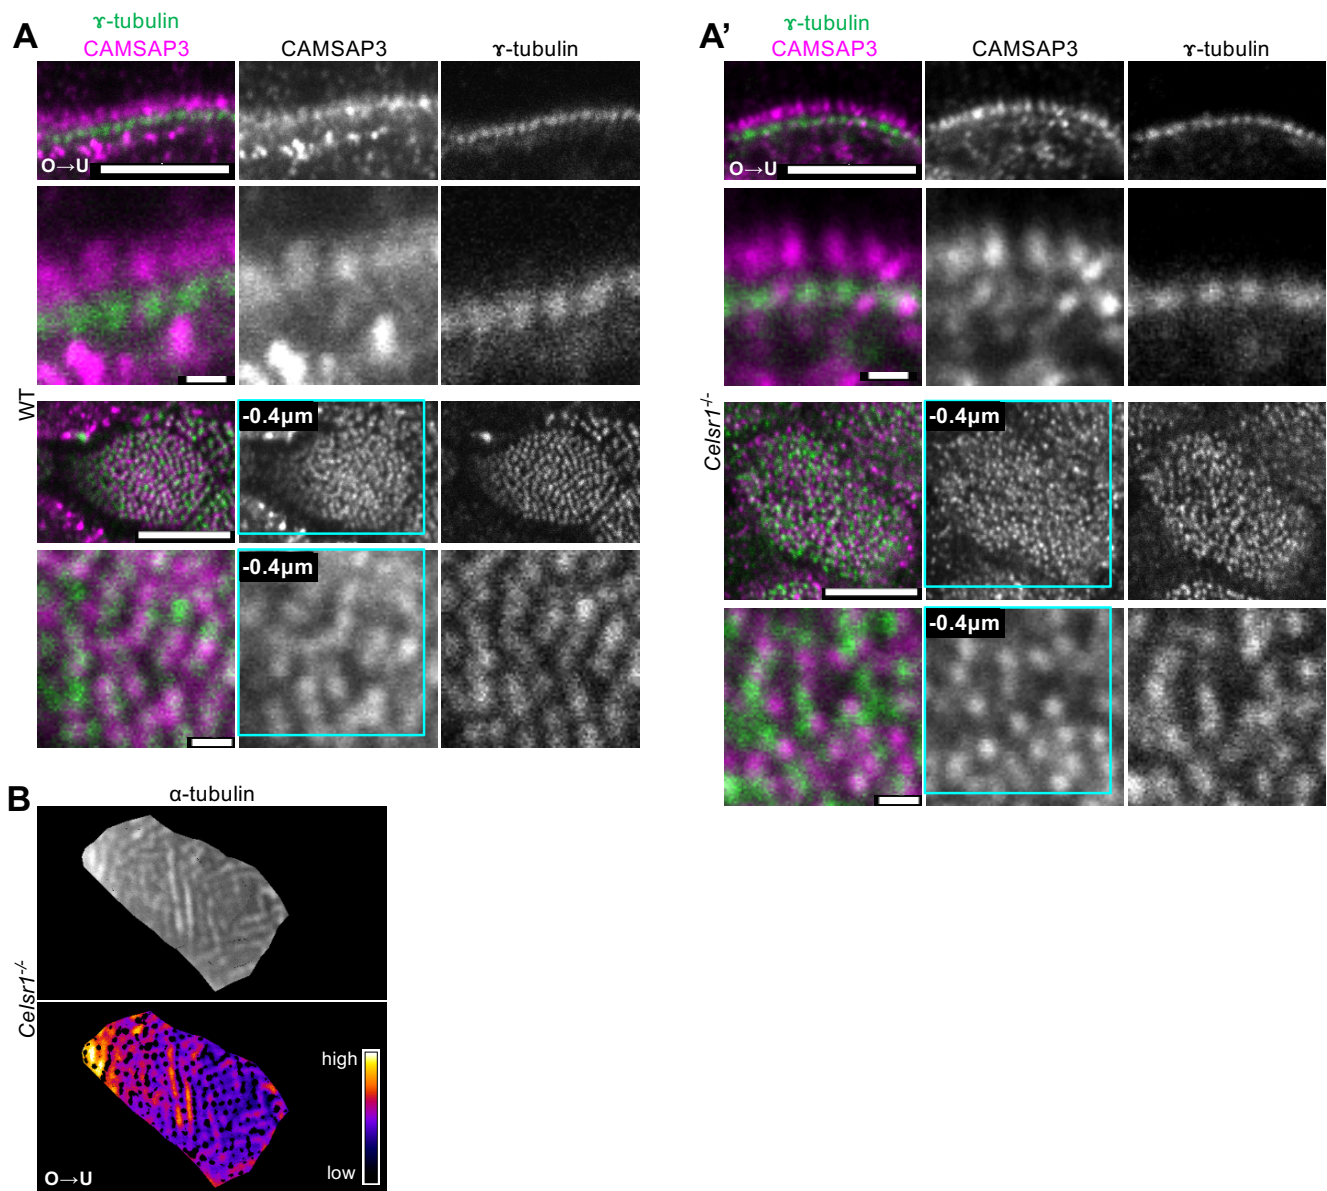

**Fig. S6, CAMSAP3 localization to the base of cilia is maintained in *Celsr1*<sup>-/-</sup> mutant**

A and A', WT and *Celsr1*<sup>-/-</sup> mutant (adult) MCCs stained with anti-CAMSAP3 (magenta) and anti- $\gamma$ -tubulin (green) antibodies; lateral view (top rows) and apical view (bottom rows). All images were single plane. The focal plane of CAMSAP3 was 0.4  $\mu$ m apical to the focal plane of  $\gamma$ -tubulin, and is indicated as "-0.4  $\mu$ m" (cyan frame). Bottom panels show the magnified images. (Bar = 5  $\mu$ m (top) and 0.5  $\mu$ m (bottom)) B, Reconstructed images of  $\alpha$ -tubulin signals located at the level of GFP-centrin2 signals in *Celsr1*<sup>-/-</sup> mutant. The same representation with Fig. 6F and F'. Intensity of signals were color-coded as shown in the bottom right inset. Position of GFP-centrin2 signals were masked to highlight the distribution of microtubules between BBs.



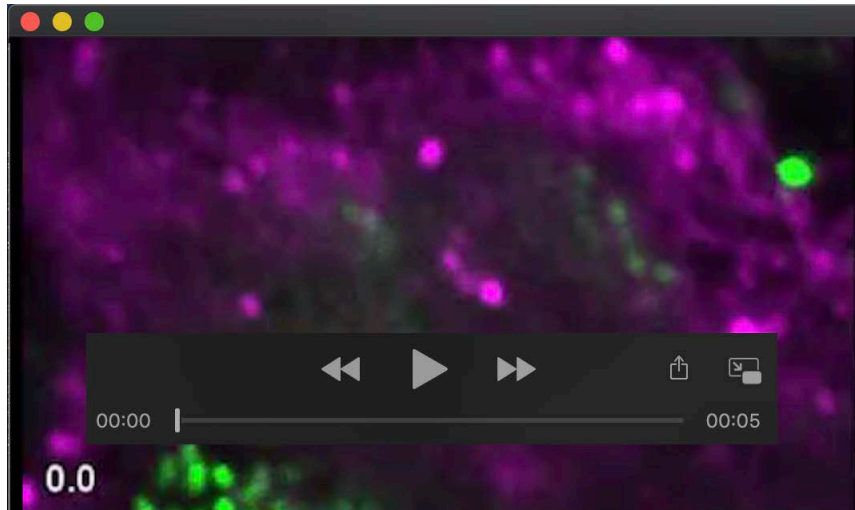

**Movie 1, Confocal microscopy images of tubulin in a MCC along the apical-basal axis**  
GFP-centrin2 (green) and  $\beta$ -tubulin (magenta) in an oviduct MCC (the same cell shown in Fig. 2D). From apical to basal, the z-step size (0.2  $\mu\text{m}$ ) is shown on the bottom.

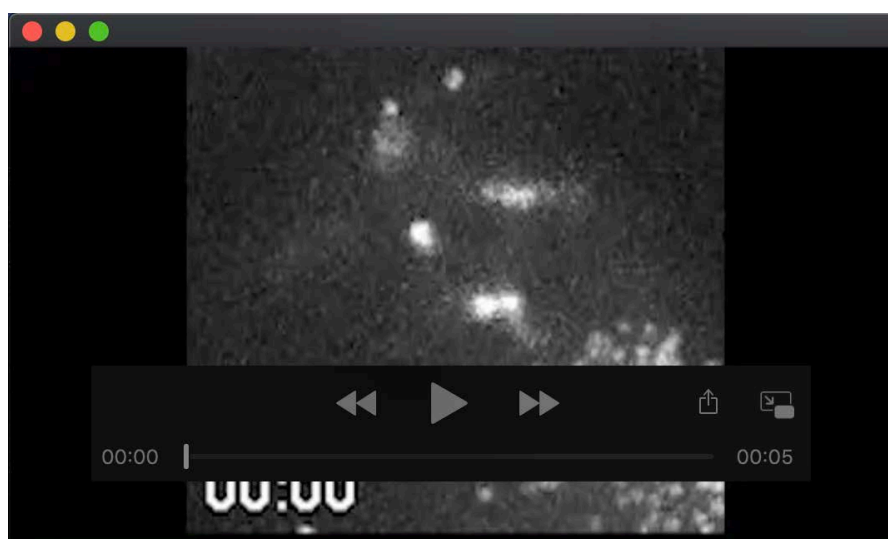

**Movie 2, Time-lapse observation of MCC maturation**  
Time-lapse recording of a cell expressing GFP-centrin2. Snapshots are shown in Fig. S3C. The timepoint is indicated at the bottom (in hours). MIP images were rendered from micrographs acquired at a step size of 0.5  $\mu\text{m}$ .

| REAGENT or RESOURCE                                                        | SOURCE                    | IDENTIFIER                                                                            | remark   |
|----------------------------------------------------------------------------|---------------------------|---------------------------------------------------------------------------------------|----------|
| <b>Antibodies</b>                                                          |                           |                                                                                       |          |
| Guinea pig polyclonal anti-Celsr1                                          | Shi et al., 2014          | N/A                                                                                   | Fixation |
| Rabbit polyclonal anti-Vangl1                                              | Sigma-Aldrich             | Cat# HPA025235; RRID: AB_1858718                                                      | 4% PFA   |
| Mouse monoclonal anti- $\alpha$ -Tubulin (clone DM1A)                      | Sigma-Aldrich             | Cat#T6199; RRID: AB_477583                                                            | 4% PFA   |
| Rabbit monoclonal anti- $\beta$ -Tubulin (clone 9F3)                       | Cell Signaling Technology | Cat#2128s; RRID: AB_823664                                                            | 4% PFA   |
| Mouse monoclonal anti-Acetylated-Tubulin (Acetylated- $\alpha$ -Tubulin)   | Sigma-Aldrich             | Cat#T7451; RRID: AB_609894                                                            | 4% PFA   |
| Rabbit polyclonal anti-CAMSAP3                                             | Tanaka et al., 2012       | N/A                                                                                   | MetOH    |
| Rat monoclonal anti-Odf2                                                   | Tateishi et al. 2013      | N/A                                                                                   | MetOH    |
| Mouse monoclonal anti-Centrinolin (C-9)                                    | Santa Cruz                | Cat#sc-365521; RRID: AB_10851483                                                      | MetOH    |
| Mouse monoclonal anti- $\gamma$ -Tubulin                                   | Sigma-Aldrich             | Cat#T6557; RRID: AB_477584                                                            | MetOH    |
| Rabbit monoclonal anti- $\gamma$ -Tubulin                                  | Abcam                     | Cat#ab179503; RRID: N/A                                                               | 4% PFA   |
| Mouse monoclonal anti-ZO1 (T8-754)                                         | Itoh et al. 1991          |                                                                                       | MetOH    |
|                                                                            |                           |                                                                                       |          |
| Goat Alexa488 anti-mouse IgG1                                              | Thermo Fisher Scientific  | Cat#A-21121; RRID: AB_2535764                                                         |          |
| Goat Alexa488 anti-mouse IgG(H+L)                                          | Thermo Fisher Scientific  | Cat#A-11029; RRID: AB_138404                                                          |          |
| Goat Alexa488 anti-rabbit IgG(H+L)                                         | Thermo Fisher Scientific  | Cat#A-11034; RRID: AB_2576217                                                         |          |
| Goat Alexa488 anti-rat IgG(H+L)                                            | Thermo Fisher Scientific  | Cat#A-11006; RRID: AB_141373                                                          |          |
| Goat Alexa488 anti-guinea pig IgG(H+L)                                     | Thermo Fisher Scientific  | Cat#A-11073; RRID: AB_2534117                                                         |          |
| Goat Alexa594 anti-mouse IgG1                                              | Thermo Fisher Scientific  | Cat#A-21125; RRID: AB_141593                                                          |          |
| Goat Alexa594 anti-rabbit(H+L)                                             | Thermo Fisher Scientific  | Cat#A-11037; RRID: AB_2534095                                                         |          |
| Goat Alexa594 anti-rat IgG(H+L)                                            | Thermo Fisher Scientific  | Cat#A-11007; RRID: AB_10561522                                                        |          |
| Goat Alexa594 anti-guinea pig IgG(H+L)                                     | Thermo Fisher Scientific  | Cat#A-11076; RRID: AB_141930                                                          |          |
| Goat STAR580 anti-mouse IgG                                                | Abberior                  | Cat#2-0002-005-1; RRID: AB_2620153                                                    |          |
| Goat STAR635P anti-rat IgG                                                 | Abberior                  | Cat#2-0132-007-5; RRID:N/A                                                            |          |
|                                                                            |                           |                                                                                       |          |
| <b>Chemicals, Peptides, and Recombinant Proteins</b>                       |                           |                                                                                       |          |
| Phalloidin Alexa594                                                        | Thermo Fisher Scientific  | Cat#A12381; RRID: AB_2315633                                                          |          |
| Phalloidin Alexa647                                                        | Thermo Fisher Scientific  | Cat#A22287; RRID: AB_2620155                                                          |          |
| CF®405M Phalloidin                                                         | Biotium                   | Cat#00034; RRID: N/A                                                                  |          |
| Hoechst33258                                                               | Thermo Fisher Scientific  | Cat#H3569; RRID: AB_2651133                                                           |          |
|                                                                            |                           |                                                                                       |          |
| <b>Experimental Models: Organisms/Strains</b>                              |                           |                                                                                       |          |
| ICR (female)                                                               | Japan SLC                 | N/A                                                                                   |          |
| Celsr1 mutant mice (female)                                                | Ravni et al., 2009        | N/A                                                                                   |          |
| Camsap3 dc/dc mutant mice (female)                                         | Toya et al., 2016         | N/A                                                                                   |          |
| B6C3F1 (genetic background of Celsr1 mutant and Camsap3 dc/dc mutant mice) | Japan SLC                 | N/A                                                                                   |          |
| GFP-Centrin2 Tg mice                                                       | Higginbotham et al., 2004 | N/A                                                                                   |          |
|                                                                            |                           |                                                                                       |          |
| <b>Software and Algorithms</b>                                             |                           |                                                                                       |          |
| ImageJ                                                                     | NIH                       | <a href="https://imagej.nih.gov/ij/">https://imagej.nih.gov/ij/</a>                   |          |
| Fiji                                                                       | Schindelin et al., 2012   | <a href="https://imagej.net/Fiji">https://imagej.net/Fiji</a>                         |          |
| R                                                                          | R Core Team (2016)        | <a href="https://www.r-project.org/">https://www.r-project.org/</a>                   |          |
| NIS-Elements                                                               | Nikon                     | <a href="http://www.nikon-instruments.jp">http://www.nikon-instruments.jp</a>         |          |
| LAS X                                                                      | Leica                     | <a href="https://www.leica-microsystems.com/">https://www.leica-microsystems.com/</a> |          |

**Table S1. Reagents and resources used in this study**



| 1st antibody | 2nd antibody | Excitation | Laser power | Emission  | STED  | STED laser power | Gate      |                                         | Fig             |
|--------------|--------------|------------|-------------|-----------|-------|------------------|-----------|-----------------------------------------|-----------------|
| Centriolin   | STAR580      | 580nm      | 10%         | 590-620nm | 775nm | 100%             |           | STAR635P → STAR580<br>(Between frames)  | 1, 2C,<br>4C, 5 |
| Odf2         | STAR635P     | 635nm      | 10%         | 655-750nm | 775nm | 100%             |           |                                         |                 |
| Centriolin   | Alexa488     | 499nm      | 10%         | 504-593nm | OFF   | 0%               |           | Alexa594 → Alexa488<br>(Between frames) | 3D              |
| CAMSAP3      | Alexa594     | 594nm      | 10%         | 603-750nm | 660nm | 20%              | 0.3ns-4ns |                                         |                 |
| CAMSAP3      | Alexa594     | 585nm      | 10%         | 590-620nm | 775nm | 20%              |           | STAR635P → Alexa594<br>(Between frames) | S2C             |
| Odf2         | STAR635P     | 635nm      | 10%         | 655-750nm | 775nm | 100%             |           |                                         |                 |

**Table S2. Detailed conditions for STED imaging**
